# Supplementary material for: Unraveling the complexities of drought stress in cotton: a multifaceted analysis of selection criteria and breeding approaches
Source: PeerJ. 2024 Jun 24;12:e17584. doi: 10.7717/peerj.17584 (PMC11210482; doi:10.7717/peerj.17584)
Supplement: Supplemental Information 1 [file peerj-12-17584-s001.xlsx]

## Sheet: Sayfa1
TEK	SUL	G	LP	BW	YD	FF	FL	FU	FS	FE
1	1	G11	40.2985	5.36	526.531	5.10759	29.2387	86.2876	36.9333	5.53179
2	1	G11	40.9836	4.88	584.454	4.97796	31.0813	86.654	34.8104	4.89342
3	1	G11	40	4.6	261.204	5.14437	28.76	84.6748	31.5149	4.64425
4	1	G11	39.5349	5.16	444.429	5.08806	30.6561	87.1967	35.9877	4.08246
1	1	G13	38.2114	4.92	496.241	5.11853	30.1607	85.7194	34.1254	6.21568
2	1	G13	38.2114	4.92	541.714	5.0236	31.2281	87.6654	35.9995	6.14678
3	1	G13	36.6972	4.36	328.571	5.21181	29.0321	84.5997	30.7128	5.7617
4	1	G13	37.6	5	455.259	5.21846	31.3934	87.7575	33.4179	6.10442
1	1	G14	38.3459	5.32	372.294	5.09365	31.0772	87.3104	33.0608	5.33446
2	1	G14	38.8889	5.04	495.982	4.46578	31.1542	85.1291	33.2887	4.35819
3	1	G14	38.0165	4.84	325.824	4.71605	30.03	83.8094	34.7592	4.49051
4	1	G14	39.7436	6.24	385.564	4.99327	26.6097	83.4885	27.106	5.36607
1	1	G18	41.8033	4.88	420.085	4.99809	32.513	86.6015	32.9663	5.77925
2	1	G18	42.6087	4.6	375.149	5.29817	28.7576	83.107	27.3089	4.87577
3	1	G18	41.7391	4.6	421.571	5.20759	30.0154	86.4981	34.8603	4.93441
4	1	G18	42.4528	4.24	484.242	4.81967	31.8228	87.7295	36.3112	4.68405
1	1	G21	44.6429	4.48	388.571	5.66577	29.5464	85.9066	36.6206	5.22271
2	1	G21	40.5405	4.44	280.904	5.30778	29.3716	86.7016	34.1005	5.52881
3	1	G21	40.1869	4.28	378.709	5.59585	29.7546	85.0158	35.4918	6.26753
4	1	G21	40.1786	4.48	450.893	5.16909	29.5085	85.6749	34.085	5.11839
1	1	G23	43.7956	5.48	345.714	5.48817	28.3813	85.7244	34.2365	5.52418
2	1	G23	42.2764	4.92	396.391	5.04155	28.672	82.9347	33.5547	6.76609
3	1	G23	42.735	4.68	260.944	5.0963	31.1209	85.6246	33.4324	5.10929
4	1	G23	42.3358	5.48	346.753	5.18485	31.4033	86.0064	33.0001	5.48416
1	1	G24	42.3077	5.2	400	5.32886	29.559	85.6976	31.9992	5.53584
2	1	G24	40.7692	5.2	445.342	5.28472	29.7968	86.3836	31.543	5.79777
3	1	G24	42.2764	4.92	341.721	5.22049	29.563	86.0377	28.5854	5.83401
4	1	G24	41.2698	5.04	386.917	4.99509	29.5196	86.4081	31.2158	6.59947
1	1	G28	39.7436	6.24	488.095	4.8477	30.7847	85.2141	32.7284	5.41511
2	1	G28	41.4201	6.76	371.87	4.75012	30.7504	81.1645	30.1225	5.48121
3	1	G28	38.1944	5.76	300.714	4.64262	28.8719	82.1317	29.3082	6.24762
4	1	G28	40.9722	5.76	351.064	4.97226	29.3695	86.0108	30.2524	5.99067
1	1	G30	43.4109	5.16	445.95	5.59101	27.9422	86.3499	29.9689	6.32262
2	1	G30	43.0894	4.92	485.272	5.20499	29.2558	86.2299	33.8908	6.92463
3	1	G30	45.3782	4.76	311.544	5.3408	25.7615	80.8766	29.9492	6.7036
4	1	G30	44.0299	5.36	556.068	5.06438	26.8195	84.2897	31.4559	7.08877
1	1	G4	38.0597	5.36	311.34	4.95018	31.6287	87.6043	35.0761	5.56888
2	1	G4	38.0952	5.04	422.857	4.79328	30.5937	87.4856	37.2446	5.2464
3	1	G4	39.5973	5.96	351.701	4.97423	31.9618	89.6256	34.429	5.78211
4	1	G4	42.2819	5.96	391.579	5.09373	28.7043	83.6573	30.2031	5.7673
1	1	K1	39.6825	5.79952	450	4.66637	29.5162	85.1871	37.5241	6.58591
2	1	K1	41.129	4.4611	387	4.84931	29.1491	85.2084	35.0151	5.86226
3	1	K1	43.4109	4.16244	280	5.072	27.086	83.968	36.4207	5.92077
4	1	K1	40.8	5.1228	413	5.41573	29.9361	87.2764	38.369	6.73012
1	1	K2	39.8374	5.30979	412	5.15141	29.3783	85.4766	32.24	6.37826
2	1	K2	41.3793	4.10375	356	5.35432	28.4344	85.7851	32.7327	6.18725
3	1	K2	41.6667	4.48949	302	5.36658	28.2346	83.7108	34.7857	5.70818
4	1	K2	41.9847	4.88712	394	5.68306	28.0489	84.643	30.9675	6.29213
1	1	K3	42.3077	5.54177	430	4.44839	28.8001	84.1183	32.4791	7.66671
2	1	K3	42.7273	4.3804	380	4.96835	28.6927	86.0518	33.9012	8.28158
3	1	K3	46.4646	4.93546	332	4.77446	25.5315	83.8452	28.6259	9.06695
4	1	K3	43.3628	4.37857	353	5.03313	27.55	84.5878	29.6247	8.15149
1	1	K4	42.446	5.61909	436	5.00914	28.7754	84.8747	34.7599	6.02751
2	1	K4	41.8033	3.11239	270	4.85472	26.8733	83.9554	31.8247	6.25475
3	1	K4	43.3333	4.59355	309	5.21842	26.9825	84.0929	30.4428	5.81137
4	1	K4	44.5378	5.32126	429	5.24021	27.7276	82.1239	32.1523	5.92732
1	1	K5	41.4634	4.43341	344	4.91811	29.3712	86.077	35.3121	5.91675
2	1	K5	41.0714	2.96254	257	5.08205	31.9917	85.0048	36.3255	5.47981
3	1	K5	42.8571	4.98006	335	5.06856	29.7033	85.0594	37.2017	5.74114
4	1	K5	39.8438	3.43587	277	5.03528	29.0867	85.9824	34.8528	5.5629

## Sheet: Sayfa2
ENV.	TEK.	LP	BW	YD	FF	FL	FU	FS	FE
LTKS	1	40.2985	5.36	526.531	5.10759	29.2387	86.2876	36.9333	5.53179
LTKS	2	40.9836	4.88	584.454	4.97796	31.0813	86.654	34.8104	4.89342
LTKS	3	40	4.6	261.204	5.14437	28.76	84.6748	31.5149	4.64425
LTKS	4	39.5349	5.16	444.429	5.08806	30.6561	87.1967	35.9877	4.08246
LTKS	5	38.2114	4.92	496.241	5.11853	30.1607	85.7194	34.1254	6.21568
LTKS	6	38.2114	4.92	541.714	5.0236	31.2281	87.6654	35.9995	6.14678
LTKS	7	36.6972	4.36	328.571	5.21181	29.0321	84.5997	30.7128	5.7617
LTKS	8	37.6	5	455.259	5.21846	31.3934	87.7575	33.4179	6.10442
LTKS	9	38.3459	5.32	372.294	5.09365	31.0772	87.3104	33.0608	5.33446
LTKS	10	38.8889	5.04	495.982	4.46578	31.1542	85.1291	33.2887	4.35819
LTKS	11	38.0165	4.84	325.824	4.71605	30.03	83.8094	34.7592	4.49051
LTKS	12	39.7436	6.24	385.564	4.99327	26.6097	83.4885	27.106	5.36607
LTKS	13	38.0597	5.36	311.34	4.95018	31.6287	87.6043	35.0761	5.56888
LTKS	14	38.0952	5.04	422.857	4.79328	30.5937	87.4856	37.2446	5.2464
LTKS	15	39.5973	5.96	351.701	4.97423	31.9618	89.6256	34.429	5.78211
LTKS	16	42.2819	5.96	391.579	5.09373	28.7043	83.6573	30.2031	5.7673
LTTS	1	41.8033	4.88	420.085	4.99809	32.513	86.6015	32.9663	5.77925
LTTS	2	42.6087	4.6	375.149	5.29817	28.7576	83.107	27.3089	4.87577
LTTS	3	41.7391	4.6	421.571	5.20759	30.0154	86.4981	34.8603	4.93441
LTTS	4	42.4528	4.24	484.242	4.81967	31.8228	87.7295	36.3112	4.68405
LTTS	5	44.6429	4.48	388.571	5.66577	29.5464	85.9066	36.6206	5.22271
LTTS	6	40.5405	4.44	280.904	5.30778	29.3716	86.7016	34.1005	5.52881
LTTS	7	40.1869	4.28	378.709	5.59585	29.7546	85.0158	35.4918	6.26753
LTTS	8	40.1786	4.48	450.893	5.16909	29.5085	85.6749	34.085	5.11839
LTTS	9	43.7956	5.48	345.714	5.48817	28.3813	85.7244	34.2365	5.52418
LTTS	10	42.2764	4.92	396.391	5.04155	28.672	82.9347	33.5547	6.76609
LTTS	11	42.735	4.68	260.944	5.0963	31.1209	85.6246	33.4324	5.10929
LTTS	12	42.3358	5.48	346.753	5.18485	31.4033	86.0064	33.0001	5.48416
LTTS	13	42.3077	5.2	400	5.32886	29.559	85.6976	31.9992	5.53584
LTTS	14	40.7692	5.2	445.342	5.28472	29.7968	86.3836	31.543	5.79777
LTTS	15	42.2764	4.92	341.721	5.22049	29.563	86.0377	28.5854	5.83401
LTTS	16	41.2698	5.04	386.917	4.99509	29.5196	86.4081	31.2158	6.59947
LTTS	17	39.7436	6.24	488.095	4.8477	30.7847	85.2141	32.7284	5.41511
LTTS	18	41.4201	6.76	371.87	4.75012	30.7504	81.1645	30.1225	5.48121
LTTS	19	38.1944	5.76	300.714	4.64262	28.8719	82.1317	29.3082	6.24762
LTTS	20	40.9722	5.76	351.064	4.97226	29.3695	86.0108	30.2524	5.99067
LTTS	21	43.4109	5.16	445.95	5.59101	27.9422	86.3499	29.9689	6.32262
LTTS	22	43.0894	4.92	485.272	5.20499	29.2558	86.2299	33.8908	6.92463
LTTS	23	45.3782	4.76	311.544	5.3408	25.7615	80.8766	29.9492	6.7036
LTTS	24	44.0299	5.36	556.068	5.06438	26.8195	84.2897	31.4559	7.08877

## Sheet: KS
G	LP	BW	YD	FF	FL	FU	FS	FE
LTKS 116	40.2042	5	454.154	5.07949	29.934	86.2033	34.8116	4.78798
LTKS 128	37.68	4.8	455.446	5.1431	30.4536	86.4355	33.5639	6.05715
LTKS 130	38.7487	5.36	394.916	4.81719	29.7178	84.9344	32.0537	4.88731
LTTS 34	42.151	4.58	425.262	5.08088	30.7772	85.984	32.8617	5.06837
LTTS 59	41.3872	4.42	374.769	5.43462	29.5453	85.8247	35.0745	5.53436
LTTS 73	42.7857	5.14	337.451	5.20272	29.8944	85.0725	33.5559	5.72093
LTTS 74	41.6558	5.09	393.495	5.20729	29.6096	86.1318	30.8359	5.94177
LTTS 117	40.0826	6.13	377.936	4.80318	29.9442	83.6303	30.6029	5.78365
LTTS 142	43.9771	5.05	449.708	5.3003	27.4447	84.4366	31.3162	6.7599
LTKS 34	39.5085	5.58	369.369	4.95285	30.7221	87.0932	34.2382	5.59117
K1	41.2556	4.88646	382.5	5.00085	28.9219	85.41	36.8322	6.27476
K2	41.217	4.69754	366	5.38884	28.524	84.9039	32.6815	6.14146
K3	43.7156	4.80905	373.75	4.80608	27.6436	84.6508	31.1577	8.29168
K4	43.0301	4.66157	361	5.08062	27.5897	83.7617	32.2949	6.00524
K5	41.3089	3.95297	303.25	5.026	30.0382	85.5309	35.923	5.67515

## Sheet: TS
G	LP	BW	YD	FF	FL	FU	FS	FE
LTKS 116	40.3589	4.99	454.765	4.71549	31.0468	86.0767	36.3263	6.38562
LTKS 128	40.1314	5.3	445.774	5.01916	30.4702	85.423	33.9801	5.99706
LTKS 130	39.8183	5.23	439.708	4.77755	30.1659	85.2855	33.9301	5.97849
LTTS 34	40.0816	4.92	505.355	4.8001	31.2023	86.3467	33.9975	5.94622
LTTS 59	39.8521	5.19	543.404	4.74237	31.2824	85.1586	33.2622	5.1166
LTTS 73	40.058	5.2	523.161	5.10816	30.1655	85.0645	33.5238	5.79444
LTTS 74	39.5054	5.22	480.833	4.78984	31.801	86.4849	34.4471	5.19257
LTTS 117	40.904	5.21	513.706	4.90028	31.0535	85.899	33.1093	5.63969
LTTS 142	38.752	5.47	497.63	4.85893	30.994	85.4951	32.3423	5.5427
LTKS 34	41.3796	4.85	492.854	5.01752	29.3891	84.1397	33.0574	6.21563
K1	40.0006	5.28	495.85	4.82194	30.8282	85.3337	33.257	5.45249
K2	40.8239	5.02	553.117	4.81635	30.7979	84.5571	31.4362	5.79967
K3	39.9498	5.3	455.266	4.90235	31.4667	85.5045	34.6062	5.5234
K4	40.2243	4.96	497.732	4.83854	30.4903	85.0541	32.6328	6.06165
K5	41.1922	4.99	456.043	4.59203	30.6496	85.4229	34.7487	6.23624
